# Supplementary material
Source: HighWire-hosted journal article supplement (https://jnm.snmjournals.org/highwire/filestream/108477/field_highwire_adjunct_files/0/262866_Supplemental_Data.pdf)
Supplement: 262866_Supplemental_Data.pdf [file 262866_Supplemental_Data.pdf]

Supplemental Table 1: Cox proportional hazards model for Disease-free survival (DFS) in relation to clinicopathological variables and uPAR- and 18F-FDG-uptake. T tumor; N node; M metastasis

| Disease-free survival (DFS) |                |    |                     |       |              |                       |       |              |
|-----------------------------|----------------|----|---------------------|-------|--------------|-----------------------|-------|--------------|
|                             |                |    | Univariate analysis |       |              | Multivariate analysis |       |              |
| Variables:                  |                | n  | p-value             | HR    | 95% CI       | p-value               | HR    | 95% CI       |
| Gender                      | Women          | 9  |                     |       |              |                       |       |              |
|                             | Men            | 45 | 0.246               | 2.360 | 0.553-10.073 |                       |       |              |
| Smoking                     | <30 pack years | 29 |                     |       |              |                       |       |              |
|                             | >30 pack years | 25 | 0.264               | 1.604 | 0.700-3.679  |                       |       |              |
| TNM stage                   | S1-2           | 32 |                     |       |              |                       |       |              |
|                             | S3-4           | 22 | 0.000               | 5.088 | 2.048-12.640 | 0.005                 | 4.209 | 1.547-11.449 |
| p16                         | positive       | 26 |                     |       |              |                       |       |              |
|                             | negative       | 28 | 0.023               | 2.829 | 1.158-6.912  | 0.673                 | 1.235 | 0.464-3.287  |
| 68Ga-uPAR                   | <cutoff        | 13 |                     |       |              |                       |       |              |
|                             | >cutoff        | 41 | 0.019               | 5.678 | 1.323-24.370 | 0.029                 | 5.224 | 1.186-23.010 |
| 18F-FDG                     | <cutoff        | 42 |                     |       |              |                       |       |              |
|                             | >cutoff        | 12 | 0.009               | 3.078 | 1.321-7.176  | 0.293                 | 1.665 | 0.644-4.302  |
